# Supplementary material for: Residual burden of liver disease after HCV clearance in hemophilia: a word of caution in the era of gene therapy
Source: PubMed Central journal article supplement — Blood Adv. 2023 Jul 30;7(19):5817–24. doi: 10.1182/bloodadvances.2023010723 (PMC10561041; doi:10.1182/bloodadvances.2023010723), 2023-07-30
Supplement: BLOODA_ADV-2023-010723-mmc1.pdf [file BLOODA_ADV-2023-010723-mmc1.pdf]

## SUPPLEMENTARY MATERIAL

### **Residual burden of liver disease after HCV-clearance in hemophilia: a word of caution in the era of gene therapy**

**Authors:** Vincenzo La Mura<sup>1,2</sup>, Niccolò Bitto<sup>1</sup>, Cecilia Capelli<sup>1</sup>, Camilla Caputo<sup>1</sup>, Simona Siboni<sup>1</sup>, Sara Arcudi<sup>1</sup>, Alessandro Ciavarella<sup>1</sup>, Roberta Gualtierotti<sup>1,2</sup>, Anna Ludovica Fracanzani<sup>2,3</sup>, Angelo Sangiovanni<sup>4</sup>, Flora Peyvandi<sup>1,2</sup>.

**Affiliations:**

<sup>1</sup>Foundation I.R.C.C.S. Ca' Granda, Ospedale Maggiore Policlinico, Angelo Bianchi Bonomi and Thrombosis center, Milan, Italy

<sup>2</sup>Department of Pathophysiology and Transplantation, University of Milan, Milan, Italy.

<sup>3</sup>Foundation I.R.C.C.S. Ca' Granda, Ospedale Maggiore Policlinico, Unit of Internal Medicine and Metabolic Diseases, Milan, Italy

<sup>4</sup>Foundation I.R.C.C.S. Ca' Granda, Ospedale Maggiore Policlinico, Gastroenterology and Hepatology, Milan, Italy.

## Supplementary methods:

### **Joint evaluation in agreement to the protocol of the multidisciplinary program of the Joint ultrasound Evaluation in Hemophilia (JOINEM study, approved by the Milan Area 2 Ethics committee, number 199 2021bis):**

#### Physical examination

The HJHS score was performed by a trained physiotherapist with several years of experience in the evaluation and management of patients with hemophilia. The HJHS is based on the physical examination of the six index joints (elbows, knees and ankles) and gait assessment. The items for this scale are scored as follows: swelling (0–3), duration of swelling (0–1), muscular atrophy (0–2), crepitus on motion (0–2), range of motion (flexion loss 0–3, extension loss 0–3), strength (0–4) and joint pain (0–2), for a total score of 0–20 points per joint. The global gait score ranges from 0 to 4. Higher scores indicate poorer joint condition and range from 0 to 124 overall.<sup>1</sup>

-

#### Musculoskeletal ultrasound imaging

The HEAD-US was performed by a rheumatologist with experience in musculoskeletal ultrasound and specifically trained in the use of the HEAD-US score. A Philips Affiniti 50 machine with a 5-12 MHz linear probe was employed. In the HEAD-US score, the elbows, knees, and ankles are evaluated and scored based on synovitis (0 - 2), articular cartilage damage (0 - 4), and subchondral bone damage (0-2). Possible scores range from 0 to 8 per joint with a total score ranging from 0 to 48. Higher scores indicate a more severe arthropathy.<sup>2</sup>

#### **Reference list:**

1. Feldman BM, Funk SM, Bergstrom B-M, et al. Validation of a new pediatric joint scoring system from the International Hemophilia Prophylaxis Study Group: validity of the hemophilia joint health score. *Arthritis Care Res.* 2011;63(2):223–230.
2. Martinoli C, Della Casa Alberighi O, Di Minno G, et al. Development and definition of a simplified scanning procedure and scoring method for Haemophilia Early Arthropathy Detection with Ultrasound (HEAD-US). *Thromb. Haemost.* 2013;109(6):1170–1179.

**Supplementary Table 1: virological data**

| <b>Viral etiology</b>                                 | <b>Total</b> |
|-------------------------------------------------------|--------------|
| <i>HCV</i>                                            | 33 (28%)     |
| <i>HCV/HBV</i>                                        | 53 (45%)     |
| <i>HCV/HIV</i>                                        | 10 (8%)      |
| <i>HCV/HBV/HIV</i>                                    | 23 (19%)     |
| <b>HCV genotype</b>                                   |              |
| <i>1a</i>                                             | 47 (40%)     |
| <i>1b</i>                                             | 32 (27%)     |
| <i>2</i>                                              | 9 (8%)       |
| <i>3</i>                                              | 12 (10%)     |
| <i>4</i>                                              | 1 (1%)       |
| <i>Genotype not available</i>                         | 18 (15%)     |
| <b>Eradication regimen or spontaneous eradication</b> |              |
| <i>IFN standard</i>                                   | 5 (4%)       |
| <i>IFN standard + ribavirin</i>                       | 2 (2%)       |
| <i>PEG-IFN+ribavirin</i>                              | 33 (28%)     |
| <i>PEG-IFN+telaprevir+Ribavirin</i>                   | 1 (1%)       |
| <i>IFN lambda+ribavirin+daclatasvir</i>               | 2 (2%)       |
| <i>DAA+ribavirin</i>                                  | 11 (9%)      |
| <i>DAA</i>                                            | 53 (45%)     |
| <i>Spontaneous eradication</i>                        | 12 (10%)     |
| <b>Previous failure</b>                               |              |
| <i>PEG-IFN+ribavirin</i>                              | 29 (24%)     |
| <i>PEG-IFN</i>                                        | 1 (1%)       |
| <i>IFN standard</i>                                   | 10 (8%)      |
| <i>DAA</i>                                            | 1 (1%)       |
| <b>HBV status</b>                                     |              |
| <i>HBsAg +, on antiviral</i>                          | 3 (3%)       |
| <i>HBsAg +, not on antiviral</i>                      | 1 (2%)       |
| <i>HBsAg +, DNA negative</i>                          | 4 (3%)       |
| <i>HBsAb +/HBcAb+</i>                                 | 60 (50%)     |
| <i>HbsAb -/HBcAb+</i>                                 | 14 (12%)     |
| <i>HBsAb +/HBcAb -</i>                                | 37 (31%)     |
| <i>HBsAb -/HBcAb-</i>                                 | 7 (6%)       |

**Supplementary Table 2:** Age distribution by metabolic risk factors (RFs) and alcohol consumption

| <b>Alcohol consumption</b>                                  | <b>Age</b> | <b>p</b>    |
|-------------------------------------------------------------|------------|-------------|
| 0-6 U/week (n=89)                                           | 52 (36-85) | 0.345 (J-T) |
| 7-14 U/week (n=16)                                          | 59 (39-73) |             |
| ≥14 U/week (n=14)                                           | 53 (39-87) |             |
| <b>Metabolic RFs</b>                                        | <b>Age</b> | <b>p</b>    |
| 0 (n=26)                                                    | 48 (36-80) | 0.007 (J-T) |
| 1 (n=27)                                                    | 51 (36-74) |             |
| 2 (n=40)                                                    | 57 (39-87) |             |
| ≥3 (n=26)                                                   | 53 (42-79) |             |
| <b>Combined RFs</b>                                         | <b>Age</b> | <b>p</b>    |
| Alcohol consumption <14 U/week,<br>Metabolic RFs < 3 (n=80) | 54 (36-85) | 0.375 (K-W) |
| Alcohol consumption ≥14 U/week,<br>Metabolic RFs <3 (n=13)  | 51 (39-87) |             |
| Alcohol consumption <14 U/week,<br>Metabolic RFs ≥3 (n=25)  | 52 (42-79) |             |
| Alcohol consumption ≥14,<br>Metabolic RFs≥3 (n=1)           | 73         |             |

RFs: Risk Factors; J-T: Jonckheere-Terpstra test; K-W: Kruskal Wallis test

**Supplementary Table 3:** Characteristics of patients who developed hepatocarcinoma and treatment strategies

| Characteristics                                   | Patient 1                                                                      | Patient 2                                                            | Patient 3                                                        |
|---------------------------------------------------|--------------------------------------------------------------------------------|----------------------------------------------------------------------|------------------------------------------------------------------|
| <b>Etiology</b>                                   | HCV                                                                            | HCV                                                                  | HCV                                                              |
| <b>HBV serology</b>                               | HBcAb neg/HBsAb neg                                                            | HBcAb pos/HBsAb pos                                                  | HBcAb pos/HBsAb pos                                              |
| <b>Alcohol intake (units/week)</b>                | 7                                                                              | 0                                                                    | 0                                                                |
| <b>Comorbidities</b>                              | Arterial hypertension, ischemic heart disease, type 2 diabetes, cholelithiasis | Anxiety disorder, nephrolithiasis                                    | None                                                             |
| <b>Age (years) at HCV eradication</b>             | 51                                                                             | 46                                                                   | 65                                                               |
| <b>Age (years) at screening</b>                   | 57                                                                             | 51                                                                   | 69                                                               |
| <b>Age (years) (and time) at HCC diagnosis</b>    | 57 (Feb 2021)                                                                  | 51 (Apr 2021)                                                        | 61 (Nov 2013)                                                    |
| <b>Last LSM (KPa) before first HCC diagnosis</b>  | Not available                                                                  | 20                                                                   | 11                                                               |
| <b>Already in semestral US surveillance</b>       | No                                                                             | No                                                                   | Yes                                                              |
| <b>Peri-HCC histology</b>                         | Non-alcoholic steatohepatitis                                                  | Micronodular cirrhosis                                               | Micronodular cirrhosis                                           |
| <b>Milan criteria at diagnosis</b>                | Out                                                                            | Out                                                                  | In                                                               |
| <b>First line of HCC treatment</b>                | Resection and MWTA (March 21)                                                  | Resection (May 21)                                                   | RFTA (December 2013)                                             |
| <b>Further treatments before liver transplant</b> | TACE, atezolizumab-bevacizumab (April 2022)                                    | MWTA (September 2021)                                                | HCC relapse in 2022: TACE (total: 6 treatments) MWTA 1 treatment |
| <b>Outcome after liver transplant</b>             | Relapse                                                                        | Disease free at last visit (patients transplanted in other hospital) | Disease free at last visit                                       |

*neg/pos: negative/positive; MWTA: macro-wave thermo-ablation; TACE: trans-arterial chemoembolization*

**Supplementary Table 4:** Liver stiffness 8 kPa threshold matched with the most important clinical and US features suggestive of advanced fibrosis/cirrhosis

|                                                          | Liver stiffness categories (kPA) |              |        |
|----------------------------------------------------------|----------------------------------|--------------|--------|
|                                                          | <8<br>(n=66)                     | ≥8<br>(n=24) | p      |
| <b>At least one US sign of cirrhosis</b>                 | 12 (18%)                         | 20 (83%)     | <0.001 |
| <b>Irregular or nodular margins</b>                      | 5 (8%)                           | 12 (50%)     | <0.001 |
| <b>Caudate lobe hypertrophy</b>                          | 1 (2%)                           | 5 (21%)      | 0.002  |
| <b>Splenomegaly</b>                                      | 9 (14%)                          | 16 (68%)     | <0.001 |
| <b>Portal vein dilatation</b>                            | 2 (3%)                           | 4 (17%)      | 0.033  |
| <b>Previous events of decompensation</b>                 | 0                                | 4 (17%)      | <0.001 |
| <b>History of esophageal varices</b>                     | 0                                | 8 (67%)      | 0.009  |
| <b>NAFLD</b>                                             | 23 (35%)                         | 7 (29%)      | 0.386  |
| <b>Alcohol consumption (7-14 U/week)</b>                 | 8 (12%)                          | 2 (9%)       | 0.662  |
| <b>Alcohol consumption (&gt;14U/week)</b>                | 8 (12%)                          | 4 (17%)      | 0.517  |
| <b>Any metabolic risk factor</b>                         | 45 (68%)                         | 22 (92%)     | 0.020  |
| <b>Any metabolic risk factor or alcohol &gt;7 U/week</b> | 48 (73%)                         | 22 (92%)     | 0.052  |
| <b>Platelet count &lt; 150.000/mcL</b>                   | 4 (6%)                           | 6 (25%)      | 0.014  |
| <b>Platelet count &lt; 100.000/mcL</b>                   | 0                                | 4 (17%)      | <0.001 |
